# Supplementary material
Source: publisher figshare collection journal article supplement (https://acs.figshare.com/ndownloader/files/4989040)
Supplement: Supplementary file 1 [file 4989040]

# Reactions of an Isolable Dialkylstannylene with Carbon Disulfide and Related Heterocumulenes

*Chenting Yan, Zheng Xu, Xu-Qiong Xiao, Zhifang Li,\* Qiong Lu, Guoqiao Lai and*

*Mitsuo Kira\**

Key Laboratory of Organosilicon Chemistry and Material Technology of Ministry of Education, Hangzhou Normal University, Hangzhou, 311121, Zhejiang, People's Republic of China

[zhifanglee@hznu.edu.cn](mailto:zhifanglee@hznu.edu.cn), [mkira@m.tohoku.ac.jp](mailto:mkira@m.tohoku.ac.jp)

## *Supporting Information*

### **Contents**

|                                                                                                              |        |
|--------------------------------------------------------------------------------------------------------------|--------|
| 1. X-ray analysis of <b>8</b> , <b>9</b> , and <b>11</b> .                                                   | S - 2  |
| 2. $^1\text{H}$ , $^{13}\text{C}$ , and $^{119}\text{Sn}$ NMR spectra of <b>8</b> , <b>9</b> and <b>11</b> . | S - 3  |
| 3. MALDI-TOFMS spectra of <b>8</b> and <b>9</b> .                                                            | S - 8  |
| 4. The rearrangement of <b>8</b> to <b>9</b>                                                                 | S - 9  |
| 5. Kinetic study of the rearrangement of <b>8</b> to <b>9</b> .                                              | S - 11 |
| 6. DFT calculations                                                                                          | S - 12 |
| 7. References                                                                                                | S -13  |

## 1. X-ray analysis of 8, 9 and 11.

**Molecular structure determination.** Single crystals of **8**, **9** and **11** suitable for X-ray analysis were obtained by the recrystallization from hexane. The X-ray diffraction data were collected on a Bruker Smart Apex CCD diffractometer with graphite monochromated Mo-K $\alpha$  radiation ( $\lambda = 0.71073$  Å) using the  $\omega$ -2 $\theta$  scan mode. The structures were solved by direct methods and refined on  $F^2$  by full-matrix least-squares methods using SHELX-2000.<sup>S1</sup> Crystal and refinement data for **8**, **9**, and **11** are deposited with CCDC; CCDC Nos. are 1432785, 1432786 and 1432787, respectively.

**Table S1.** Crystal and Refinement Data for **8**, **9** and **11**

| Parameters                                                                           | <b>8</b>                                                                       | <b>9</b>                                                                       | <b>11</b>                                                          |
|--------------------------------------------------------------------------------------|--------------------------------------------------------------------------------|--------------------------------------------------------------------------------|--------------------------------------------------------------------|
| Empirical formula                                                                    | C <sub>34</sub> H <sub>80</sub> S <sub>4</sub> Si <sub>8</sub> Sn <sub>2</sub> | C <sub>34</sub> H <sub>80</sub> S <sub>4</sub> Si <sub>8</sub> Sn <sub>2</sub> | C <sub>29</sub> H <sub>59</sub> NO <sub>2</sub> Si <sub>4</sub> Sn |
| Formula weight                                                                       | 1079.32                                                                        | 1079.32                                                                        | 684.82                                                             |
| Crystal system, Space group                                                          | Monoclinic, P2(1)/c                                                            | Triclinic, P-1                                                                 | Triclinic, P1                                                      |
| <i>a</i> [Å]                                                                         | 11.6252(10)                                                                    | 11.5533(12)                                                                    | 11.545(2)                                                          |
| <i>b</i> [Å]                                                                         | 28.719(3)                                                                      | 15.0410(15)                                                                    | 11.929(3)                                                          |
| <i>c</i> [Å]                                                                         | 17.7048(16)                                                                    | 17.1546(18)                                                                    | 15.061(4)                                                          |
| $\alpha$ [deg]                                                                       | 90                                                                             | 88.192(2)                                                                      | 75.183(6)                                                          |
| $\beta$ [deg]                                                                        | 108.850(2)                                                                     | 71.330(2)                                                                      | 67.479(3)                                                          |
| $\gamma$ [deg]                                                                       | 90                                                                             | 76.698(2)                                                                      | 76.791(4)                                                          |
| <i>V</i> [Å <sup>3</sup> ]                                                           | 5594.0(9)                                                                      | 2745.5(5)                                                                      | 1832.4(7)                                                          |
| <i>Z</i> , <i>D</i> <sub>calcd</sub> [Mg /m <sup>-3</sup> ]                          | 4, 1.282                                                                       | 2, 1.306                                                                       | 2, 1.241                                                           |
| $\mu$ [mm <sup>-1</sup> ]                                                            | 1.235                                                                          | 1.258                                                                          | 0.852                                                              |
| <i>F</i> (000)                                                                       | 2240                                                                           | 1120                                                                           | 724                                                                |
| Reflections collected                                                                | 30544                                                                          | 32975                                                                          | 18570                                                              |
| Independent Reflections                                                              | 9733                                                                           | 12389                                                                          | 6375                                                               |
| <i>R</i> (int)                                                                       | 0.0404                                                                         | 0.0251                                                                         | 0.0238                                                             |
| Data/restraints                                                                      | 9733 / 26 / 453                                                                | 12389 / 0 / 457                                                                | 6375 / 2 / 350                                                     |
| /parameters                                                                          |                                                                                |                                                                                |                                                                    |
| final <i>R</i> indices                                                               |                                                                                | 0.0333, 0.0922                                                                 | 0.0252, 0.0791                                                     |
| [ <i>I</i> > 2 $\sigma$ ( <i>I</i> )] <i>R</i> <sub>1</sub> , <i>wR</i> <sub>2</sub> | 0.0486, 0.1228                                                                 |                                                                                |                                                                    |
| <i>R</i> indices (all data) <i>wR</i> <sub>2</sub>                                   | 0.0735, 0.1372                                                                 | 0.0440, 0.1042                                                                 | 0.0327, 0.1160                                                     |

2.  $^1\text{H}$ ,  $^{13}\text{C}$ , and  $^{119}\text{Sn}$  NMR spectra of **8**, **9** and **11**.

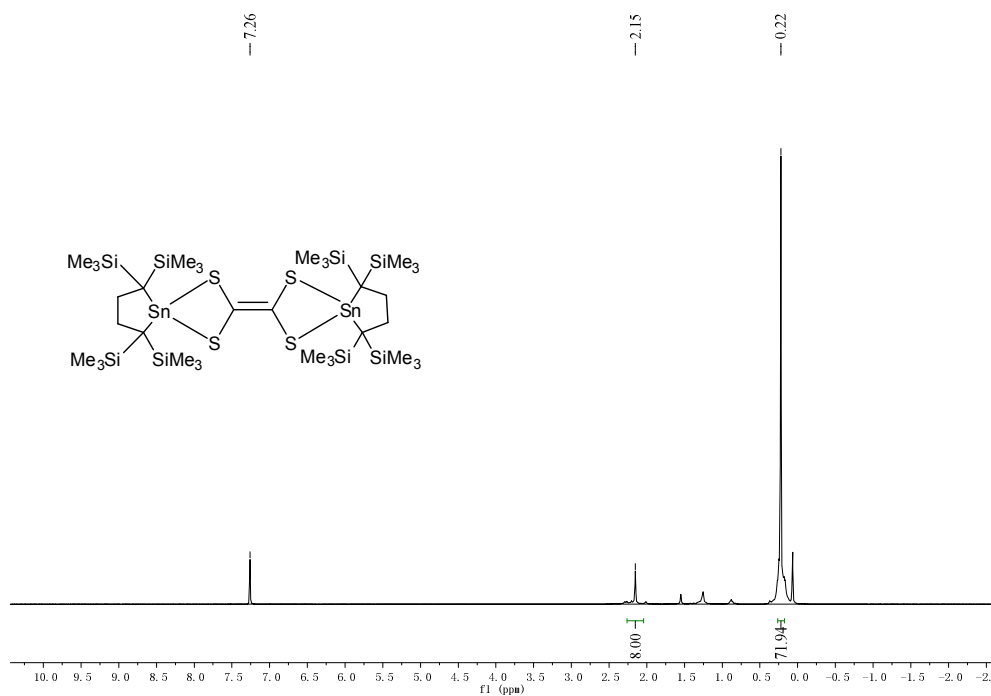

Figure S1.  $^1\text{H}$  NMR spectrum of compound **8** in  $\text{CDCl}_3$ .

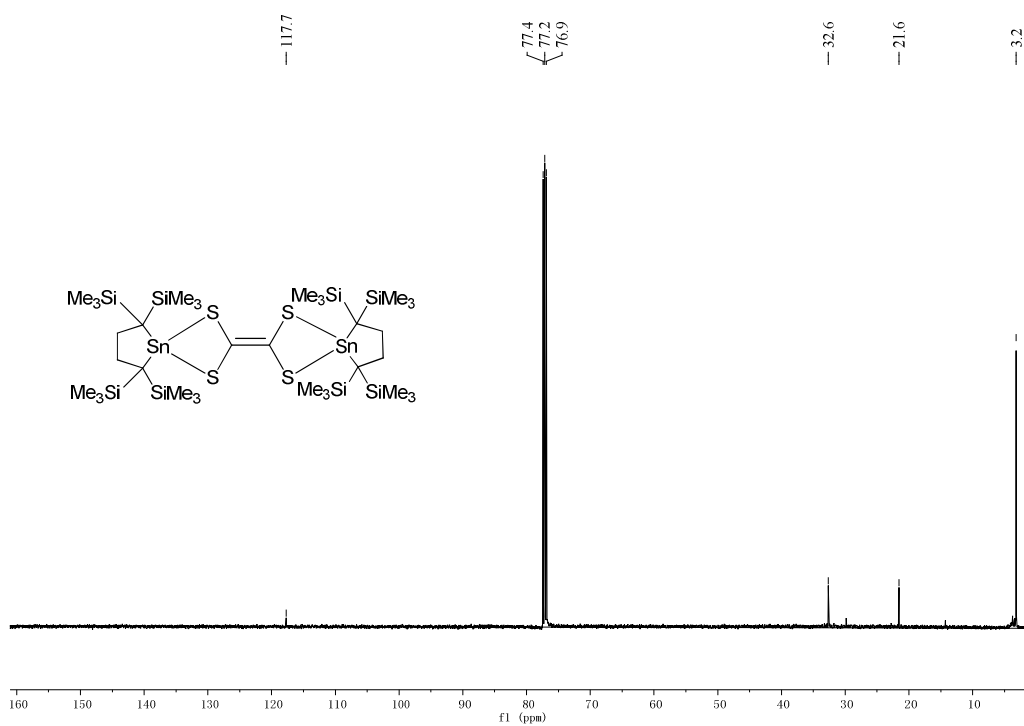

Figure S2.  $^{13}\text{C}$  NMR spectrum of compound **8** in  $\text{CDCl}_3$ .

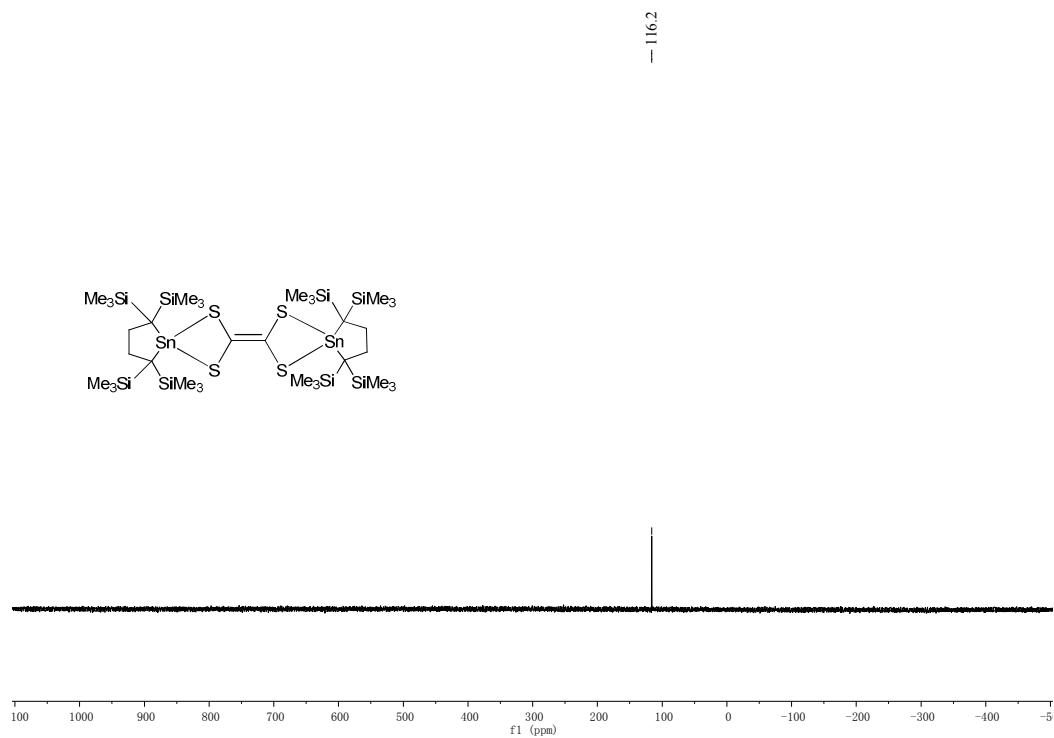

**Figure S3.**  $^{119}\text{Sn}$  NMR spectrum of compound **8** in  $\text{CDCl}_3$ .

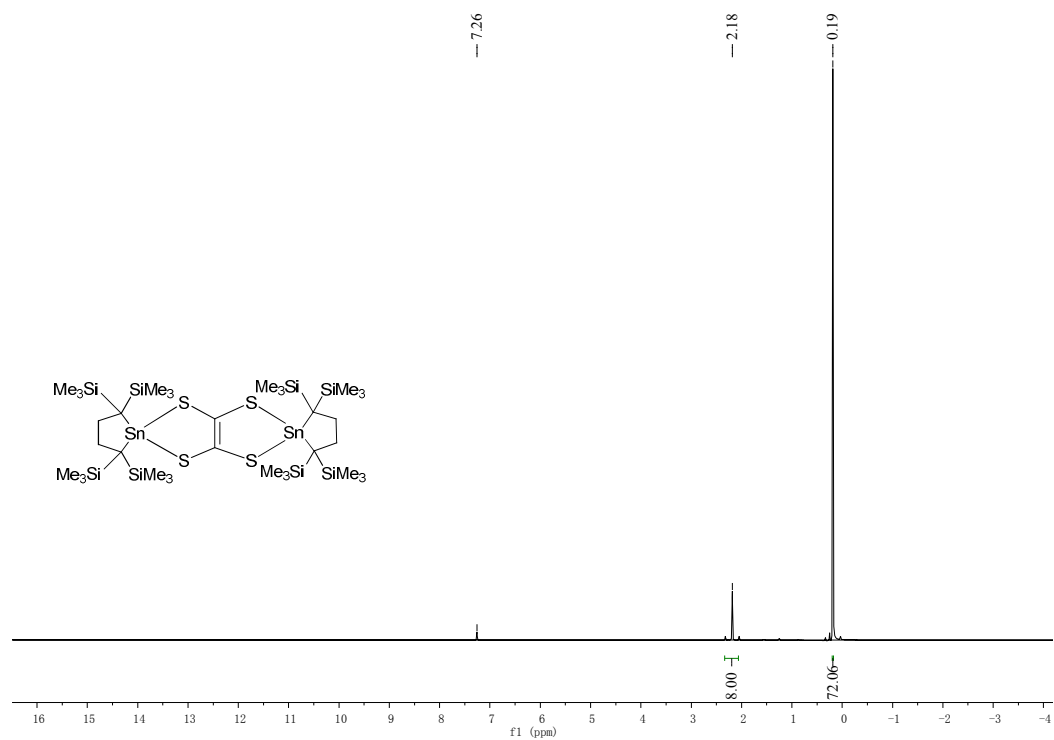

**Figure S4.**  $^1\text{H}$  NMR spectrum of compound **9** in  $\text{CDCl}_3$ .

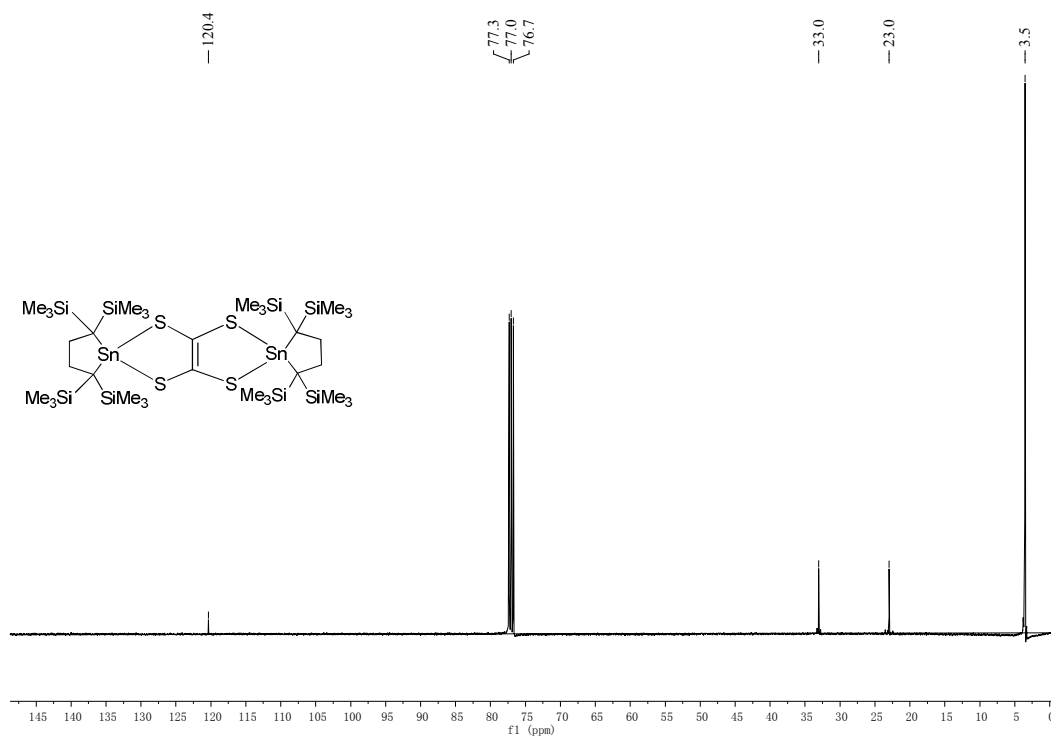

**Figure S5.**  $^{13}\text{C}$  NMR spectrum of compound **9** in  $\text{CDCl}_3$ .

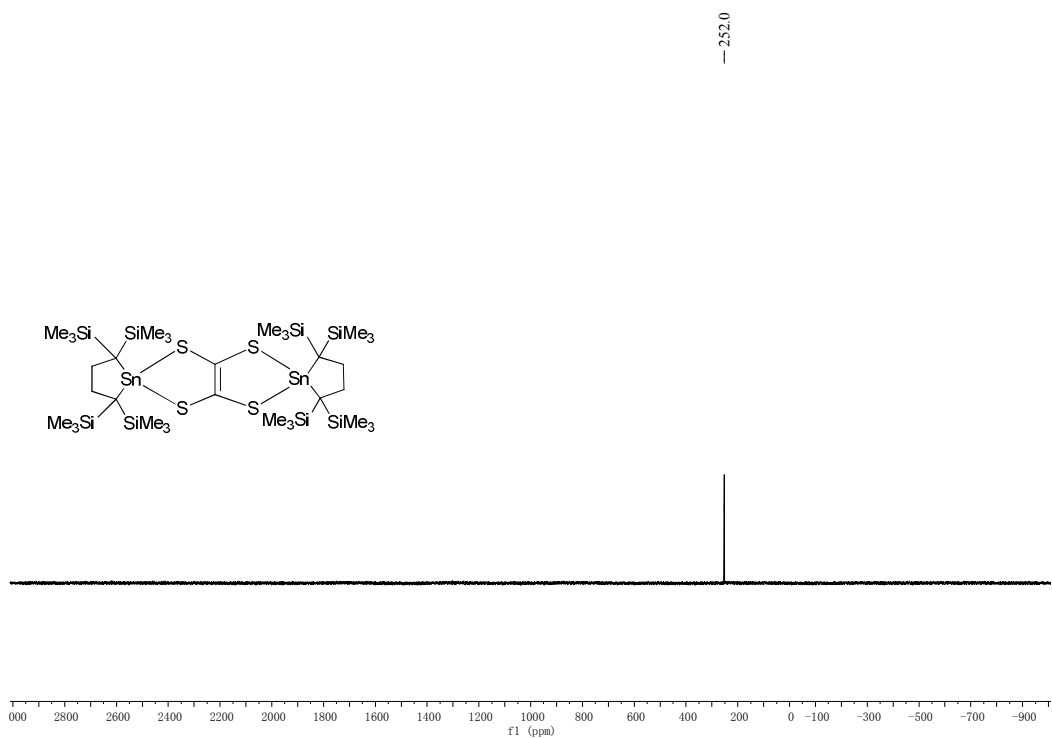

**Figure S6.**  $^{119}\text{Sn}$  NMR spectrum of compound **9** in  $\text{CDCl}_3$ .



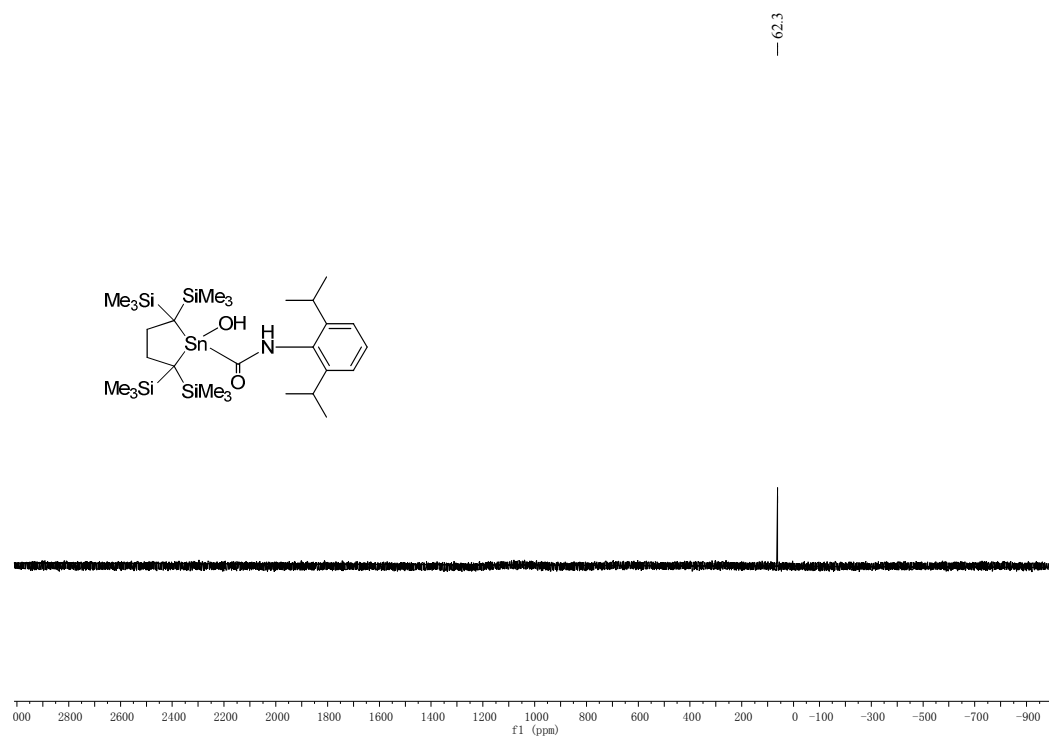

**Figure S9.**  $^{119}\text{Sn}$  NMR spectrum of compound **11** in  $\text{CDCl}_3$ .

### 3. MALDI-TOFMS spectra of 8 and 9.

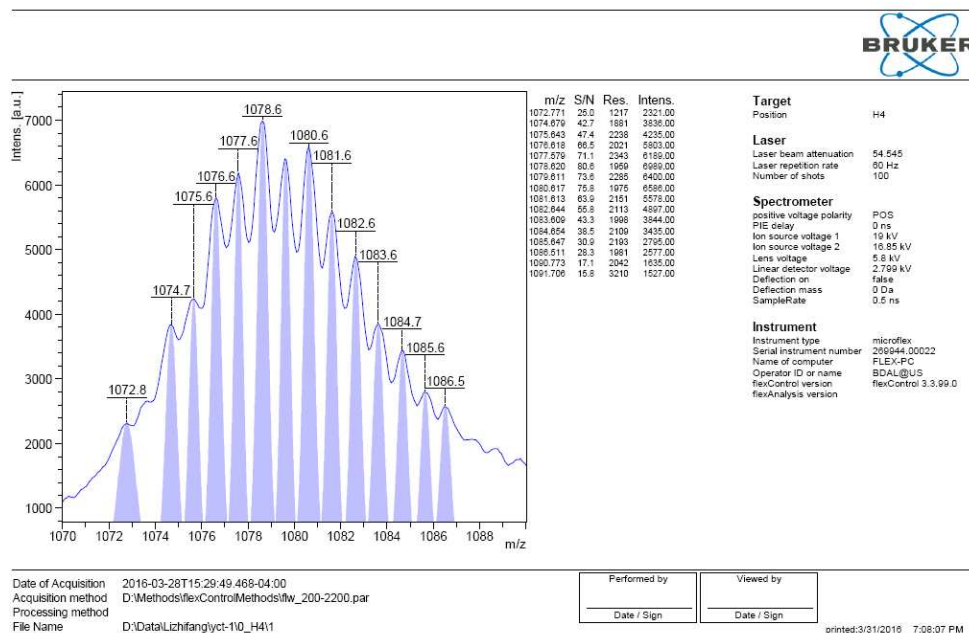

Figure S10. MALDI-TOFMS spectrum of 8.

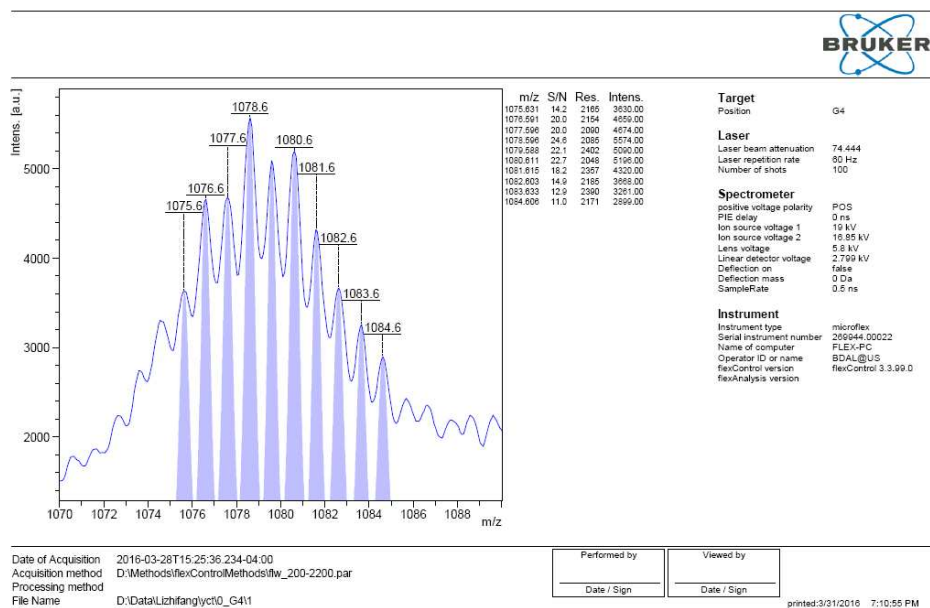

Figure S11. MALDI-TOFMS spectrum of 9.

#### 4. The rearrangement of **8** into **9**

**Thermal rearrangement of **8** to **9**.** In an NMR tube was added compound **8** (13 mg, 0.012 mmol), and C<sub>6</sub>D<sub>6</sub> (0.6 mL) and then the mixture was stirred for 48 h at 100 °C. The <sup>119</sup>Sn NMR spectrum showed the formation of **9** in 9% yields as shown in Figure S12.

**Rearrangement of **8** to **9** catalyzed by dialkylstannylene **1**.** A mixture of **8** (52 mg, 0.048 mmol), dialkylstannylene **1** (20 mol%), and hexane (10 mL) was stirred for 24h at room temperature in a 20 mL flask. The solvent was removed under vacuo. The <sup>119</sup>Sn NMR spectrum of the residue in CDCl<sub>3</sub> showed quantitative formation of **9** (Figure S13).

**Rearrangement of **8** to **9** catalyzed with BF<sub>3</sub>.** A mixture of **8** (13 mg, 0.012 mmol), CDCl<sub>3</sub> (0.6 mL), and a catalytic amount of BF<sub>3</sub> (10 mol%) in an NMR tube was stirred for 30 min at room temperature and then the <sup>119</sup>Sn NMR spectrum was measured. Compound **9** was found to form in 92% (Figure S14).

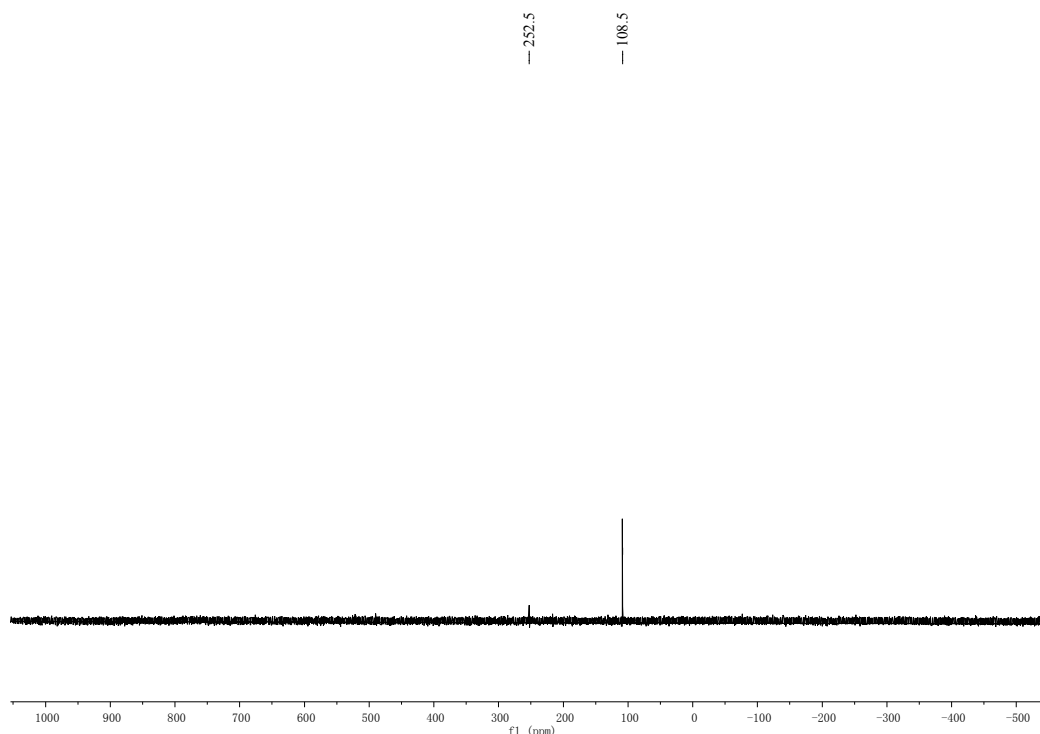

**Figure S12.** <sup>119</sup>Sn NMR spectrum obtained after the thermal reaction of **8** in C<sub>6</sub>D<sub>6</sub>.

Sn119-LZF-yct-0104  
Sn119-LZF-yct-0104

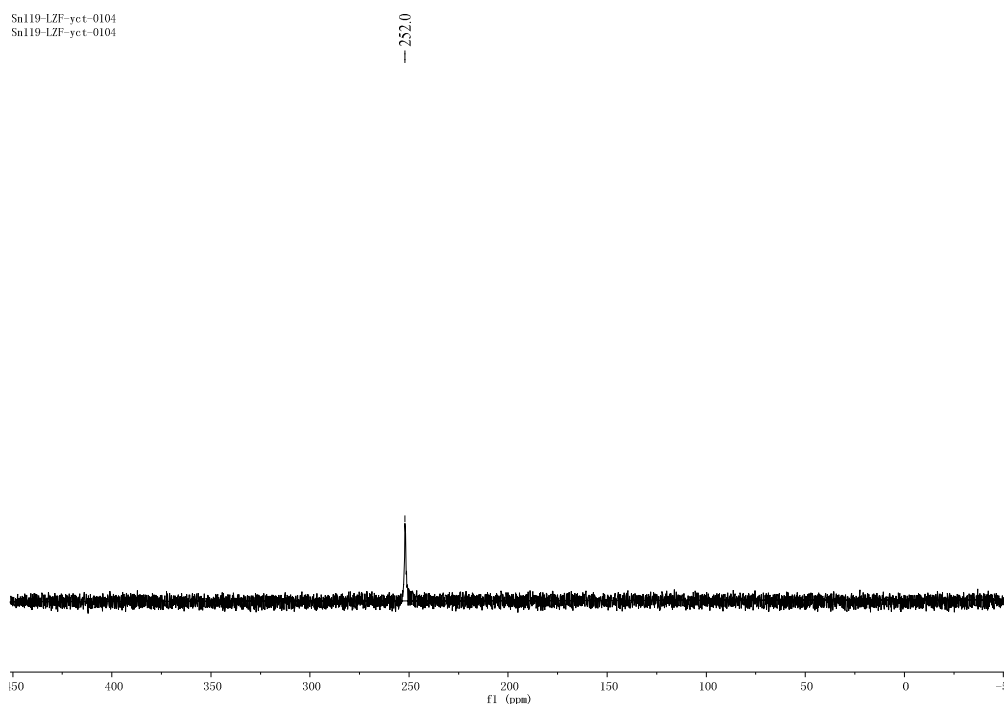

**Figure S13.**  $^{119}\text{Sn}$  NMR spectrum obtained after **8** was treated in the presence of stannylene **1** (20 mol%) in hexane at rt showing the quantitative formation of **9**. The NMR spectrum was measured in  $\text{CDCl}_3$ .

Sn119-LZF-yct-0104-1  
Sn119-LZF-yct-0104-1

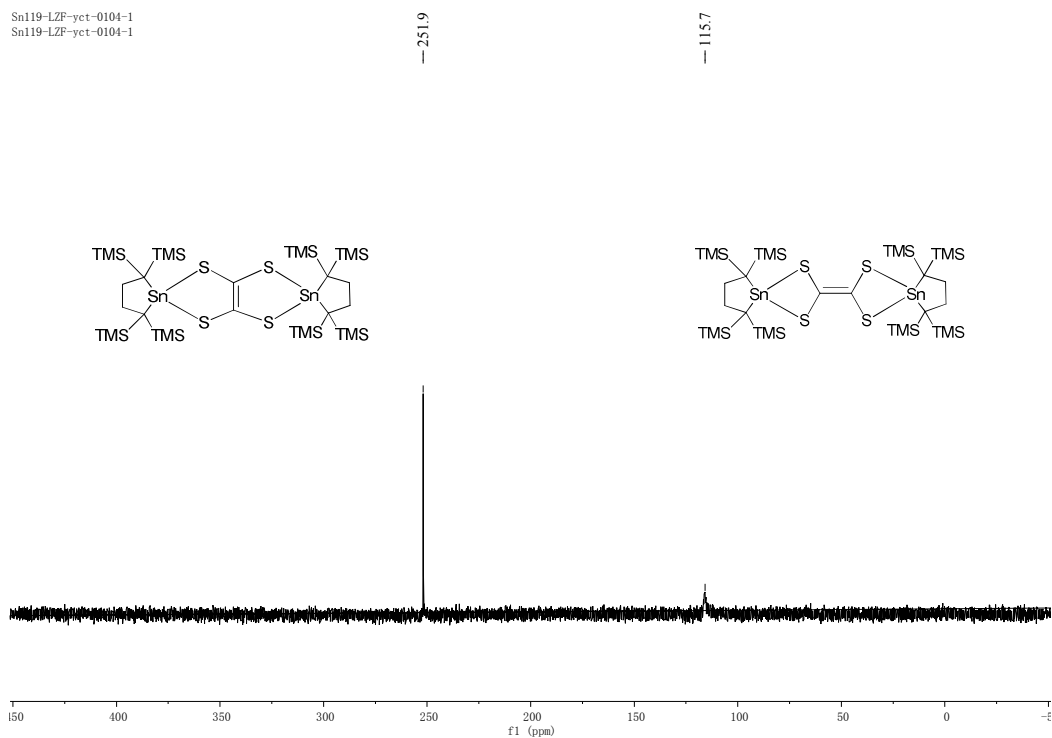

**Figure S14.**  $^{119}\text{Sn}$  NMR spectrum obtained after compound **8** was treated with  $\text{BF}_3$  (10 mol%) for 30 min in  $\text{CDCl}_3$ .

**5. Kinetic study of the rearrangement of 8 to 9.** For a kinetic study, a C<sub>6</sub>D<sub>6</sub> (1 mL) solution of **8** (50 mg, 0.046 mmol) containing stannylene **1** (1.1 mg, 5 mol%) in an NMR tube was kept at 10 °C and monitored the time course of the relative <sup>119</sup>Sn NMR signal intensities of **8** and **9**. The molar ratio of **8**/(**8**+**9**) was determined using the relative NMR signal intensities of **8** (*I*<sub>8</sub>) and **9** (*I*<sub>9</sub>) by assuming the same relaxation times for the <sup>119</sup>Sn nuclei in **8** and **9**. As the slope of a linear plot of ln(*I*<sub>8</sub>/(*I*<sub>8</sub>+*I*<sub>9</sub>)) against reaction time (*t*/h) (Figure S13), the first-order rate constant (*k*') was determined as 5.2x10<sup>-3</sup> h<sup>-1</sup> or 1.4x10<sup>-6</sup> s<sup>-1</sup>. Assuming that the rearrangement is bimolecular with the unimolecular contribution of **1**, the 2nd-order rate constant (*k*) is estimated to be 6.3x10<sup>-4</sup> M<sup>-1</sup> s<sup>-1</sup> at 10 °C. The assumption for the relaxation times, the significant temperature turbulence, and other minor ambiguities during the experiment make the rate constant rather inaccurate but the results support the proposed mechanism for the rearrangement (eq 8).

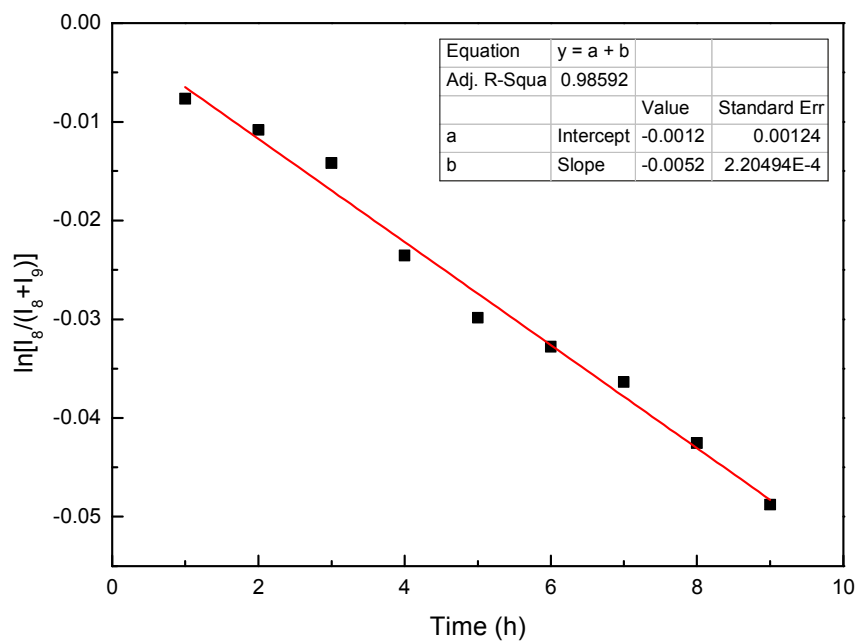

**Figure S15.** Plot of ln[*I*<sub>8</sub>/(*I*<sub>8</sub>+*I*<sub>9</sub>)] vs time.

## 6. DFT Calculations

All calculations were performed on an SGI Altix 450 server using the Gaussian 03 package<sup>S2</sup>. Geometry optimizations of all stationary points were performed by using the DFT method at the B3LYP level using the basis sets of 6-31G(d,p) for C, H, and S atoms + LanL2DZ for Sn. GaussView was used for visual inspection of the final geometries and vibrational frequencies as well as for drawing pictures of the optimized structures. All of the structures obtained herein were verified by examination of their Hessian matrix as minima (all frequencies real) or transition states (one imaginary frequency). Zero-point vibrational energies (ZPE) were incorporated into the total energies without a scale factor. At every transition state, the transition vector was animated with the GaussView program, and if necessary, the intrinsic reaction coordinate (IRC) was computed to connect the corresponding minima.

The DFT calculations were performed for the following compounds **8**, **9**, **8'**, **9'**, **8''**, and **9''**, and stationary points appeared during the reaction of **1'** with CS<sub>2</sub>.

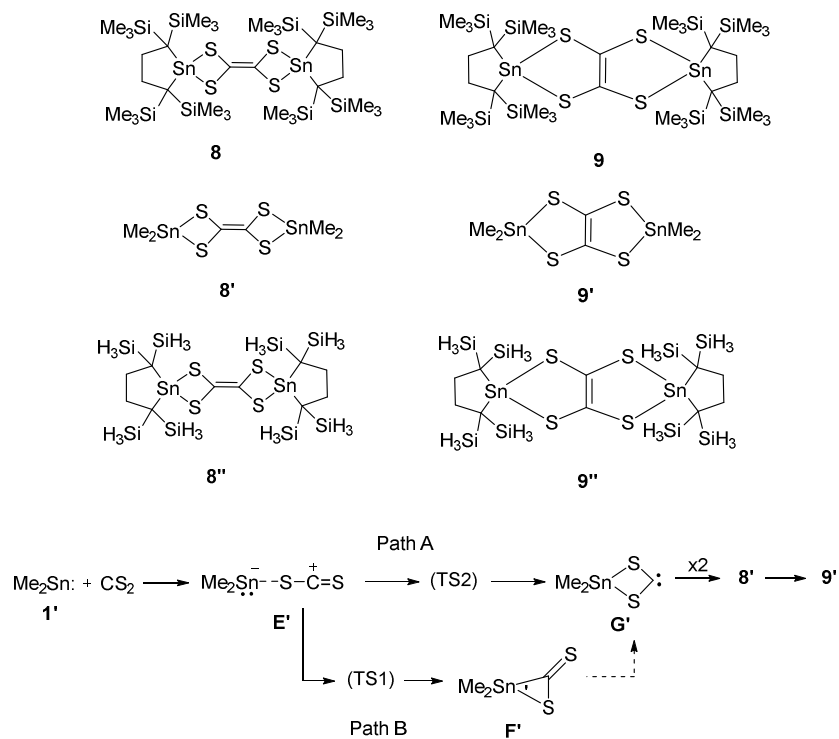

**Table S2.** Relative Energy Parameters for Species Shown in Chart S1 Calculated at the B3LYP/6-31G(d,p) for C, H, S atoms and LanL2DZ for Sn at 298.15K

|                            | $\Delta E^a$ | $\Delta H^a$ | $\Delta G^a$ | $\Delta S^b$ |
|----------------------------|--------------|--------------|--------------|--------------|
| <b>8</b>                   | <u>0.0</u>   | <u>0.0</u>   | <u>0.0</u>   | <u>0.0</u>   |
| <b>9</b>                   | -12.8        | -12.9        | -13.0        | -0.4         |
|                            |              |              |              |              |
| <b>8'</b>                  | <u>0.0</u>   | <u>0.0</u>   | <u>0.0</u>   | <u>0.0</u>   |
| <b>9'</b>                  | -15.4        | -16.0        | -13.5        | -8.2         |
|                            |              |              |              |              |
| <b>8''</b>                 | <u>0.0</u>   | <u>0.0</u>   | <u>0.0</u>   | <u>0.0</u>   |
| <b>9''</b>                 | -15.1        | -15.2        | -15.3        | 0.3          |
|                            |              |              |              |              |
| <b>1' + CS<sub>2</sub></b> | <u>0.0</u>   | <u>0.0</u>   | <u>0.0</u>   | <u>0.0</u>   |
| <b>E'</b>                  | 3.3          | 3.3          | 11.8         | -28.5        |
| <b>F'</b>                  | 6.0          | 5.9          | 16.4         | -35.1        |
| <b>G'</b>                  | 20.1         | 20.2         | 29.9         | -32.6        |
| TS1                        | 10.1         | 9.8          | 20.4         | -35.6        |
| TS2                        | 20.6         | 19.9         | 31.2         | -37.7        |
| (1/2) <b>8'</b>            | -55.7        | -56.2        | -21.7        | -115.9       |
| (1/2) <b>9'</b>            | -71.1        | -72.2        | -35.2        | -124.1       |

a. in kcal.mol<sup>-1</sup>; b. in cal.mol<sup>-1</sup>.K<sup>-1</sup>

## 7. References

- (S1) (a) C. L. Picou, E. D. Stevens, M. Shah, J. H. Boyer, *Acta Crystallogr. Sect. C* **1990**, *46*, 1148. (b) SMART, SAINT, SADABS and SHELXTL, Bruker AXS Inc., Madison, 2000.
- (S2) Gaussian 03 (Revision D.01), M. J. Frisch, G. W. Trucks, H. B. Schlegel, G. E. Scuseria, M. A. Robb, J. R. Cheeseman, J. A. Montgomery, Jr., T. Vreven, K. N. Kudin, J. C. Burant, J. M. Millam, S. S. Iyengar, J. Tomasi, V. Barone, B. Mennucci, M. Cossi, G. Scalmani, N. Rega, G. A. Petersson, H. Nakatsuji, M. Hada, M. Ehara, K. Toyota, R. Fukuda, J. Hasegawa, M. Ishida, T. Nakajima, Y. Honda, O. Kitao, H. Nakai, M. Klene, X. Li, J. E. Knox, H. P. Hratchian, J. B. Cross, V. Bakken, C. Adamo, J. Jaramillo, R. Gomperts, R. E. Stratmann, O. Yazyev, A. J. Austin, R. Cammi, C. Pomelli, J. W. Ochterski, P. Y. Ayala, K. Morokuma, G. A. Voth, P. Salvador, J. J. Dannenberg, V. G. Zakrzewski, S. Dapprich, A. D. Daniels, M. C. Strain, O. Farkas, D. K. Malick, A. D. Rabuck, K. Raghavachari, J. B. Foresman, J. V. Ortiz, Q. Cui, A. G. Baboul, S. Clifford, J. Cioslowski, B. B. Stefanov, G. Liu, A. Liashenko, P. Piskorz, I. Komaromi, R. L. Martin, D. J. Fox, T. Keith, M. A. Al-Laham, C. Y. Peng, A. Nanayakkara, M. Challacombe, P. M. W. Gill, B. Johnson, W. Chen, M. W. Wong, C. Gonzalez, and J. A. Pople, Gaussian, Inc., Wallingford CT, **2004**.
